# Supplementary material for: Identification of HOXB9 to predict prognosis of endometrial cancer based on comprehensive bioinformatics analysis
Source: Eur J Med Res. 2023 Feb 17;28:79. doi: 10.1186/s40001-022-00979-3 (PMC9936693; doi:10.1186/s40001-022-00979-3)
Supplement: Supplementary file 2 — Additional file 2. Top 100 genes co-expressed with HOXB9 [file 40001_2022_979_MOESM2_ESM.xlsx]

## Sheet: Sheet1
id
HOXB9
HOXB8
HOXB7
HOXB6
HOXB5
HOXB3
HOXB2
HOXB4
PKNOX1
COL11A2
EXT1
SKAP1
C1orf65
MACROD2
PTPRM
SST
IMAN2L
C2orf144
CDK5R2
SFXN5
C17or186
FTSJD2
FCGRT
KCND1
KLHL13
SMPD4
ZNF512
TIGD1
DHX57
KIAA0664P3
SAP130
ESYT3
DPP4
HTR6
MPP3
TMEM63C
MEIS1
TPST1
C14orf132
ZFP3
GGT7
PGAM2
SYT14
SUPT7L
COL4A4
ABLIM2
CECR7
SLC22A17
ADH4
GGTA1
ACOT9
DDB2
NUDT2
CYP4A11
GLTP
C9orf103
TMSL3				AURKA
ANXA1				AURKB
SRR				BIRC5
C9orf95				BUB1
SPINK13				C16orf59
OSTF1				C1QL4
SYTL				CCNB1
S100A7				CCNB2
GSN				CCNO
RFSPK				CCT3
SFD5A				CCT5
ZFYVE18				CCT6A
NQO1				CDC20
CIB1				CDC25A
TNS4				CDC25C
LGALS3				CDC45
FBXL8				CDC6
ONECUT3				CDCA3
RPL10L				CDCA5
PFKFB1				CDCA8
ANKRD22				CDK1
KCNN4				CDT1
SORDL				CDX2
CTNNBIP1				CENPA
HAUS4				CEP55
MKNK2				DEPDC1
PTGS2				DTL
DEFB4A				EN2
RHOC				ESPL1
CHST2				EXO1
TRPV4				FAM64A
SLAMF9				FOXD1
CFD				FOXM1
DGKA				GART
FAM25B				HJURP
SATI				HOXA10
CHP				HOXA11
ARL4D				HOXA13
MFBDO				HOXA3
RPSAPO				HOXA5
SCOB2A2				HOXA6
WSB2				HOXA7
				HOXB3
				HOXB4
				HOXB5
				HOXB6
				HOXB7
				HOXB8
				HOXC10
				HOXC13
				HOXC5
				HOXC6
				HOXC8
				HOXC9
				HOXD13
				HOXD4
				HOXD8
				IQGAP3
				KIF18B
				KIF20A
				KIF23
				KIF2C
				KIF4A
				KIFC1
				KRT18
				LMNB2
				LRRC59
				MCIDAS
				MCM7
				MELK
				MNX1
				MYBL2
				NEK2
				PAICS
				PBK
				PHB
				PKMYT1
				PLAC1
				PLK1
				PRAME
				PRC1
				PYCR1
				RACGAP1
				RAD54L
				RCC1
				RRM2
				SAPCD2
				SLC35F2
				SP6
				SSRP1
				TEAD4
				TICRR
				TK1
				TOP2A
				TPX2
				TRIP13
				TROAP
				TUBA1C
				TYMS
				ZWINT

## Sheet: Sheet3
AURKA
AURKB
BIRC5
BUB1
C16orf59
C1QL4
CCNB1
CCNB2
CCNO
CCT3
CCT5
CCT6A
CDC20
CDC25A
CDC25C
CDC45
CDC6
CDCA3
CDCA5
CDCA8
CDK1
CDT1
CDX2
CENPA
CEP55
DEPDC1
DTL
EN2
ESPL1
EXO1
FAM64A
FOXD1
FOXM1
GART
HJURP
HOXA10
HOXA11
HOXA13
HOXA3
HOXA5
HOXA6
HOXA7
HOXB3
HOXB4
HOXB5
HOXB6
HOXB7
HOXB8
HOXC10
HOXC13
HOXC5
HOXC6
HOXC8
HOXC9
HOXD13
HOXD4
HOXD8
IQGAP3
KIF18B
KIF20A
KIF23
KIF2C
KIF4A
KIFC1
KRT18
LMNB2
LRRC59
MCIDAS
MCM7
MELK
MNX1
MYBL2
NEK2
PAICS
PBK
PHB
PKMYT1
PLAC1
PLK1
PRAME
PRC1
PYCR1
RACGAP1
RAD54L
RCC1
RRM2
SAPCD2
SLC35F2
SP6
SSRP1
TEAD4
TICRR
TK1
TOP2A
TPX2
TRIP13
TROAP
TUBA1C
TYMS
ZWINT
